# Supplementary material for: Attention Decorrelates Sensory and Motor Signals in the Mouse Visual Cortex
Source: bioRxiv or medRxiv preprint supplement (doi:10.1101/615229), 2021-01-01
Supplement: Supplementary file [file media-1.pdf]

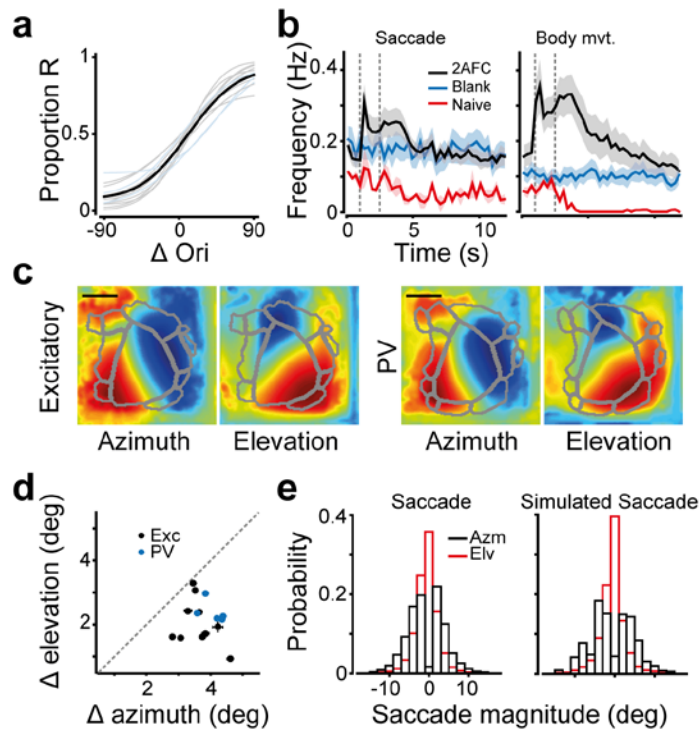

1 Extended Data Fig. 1. **a**) Psychometric curves. Black line: average across animals (n=12). Individual mice,  
 2 light color lines: excitatory mice (n=9) light gray, PV mice (n=3) light blue. Sessions with performance >60%  
 3 and time-out rate <20%. **b**) Distribution of saccades (left) and body movement times (right) in 2AFC (black)  
 4 and blank (blue) experiments. Red line, naive mice in the same 2AFC tasks (n=2). Vertical dotted lines,  
 5 open-loop period; shaded bands, s.e. **c**) Average azimuth and elevation maps for excitatory and PV mice.  
 6 Gray lines, segmentation of visual areas. Scale bar: 1mm. **d**) The amplitude of saccades in azimuth and  
 7 elevation averaged across all saccades, each dot is the mean for each animal; error bar 95% CI. **e**)  
 8 Distribution of azimuths and elevations of saccades (left), that were randomly sampled in order to  
 9 generate simulated saccades (right).

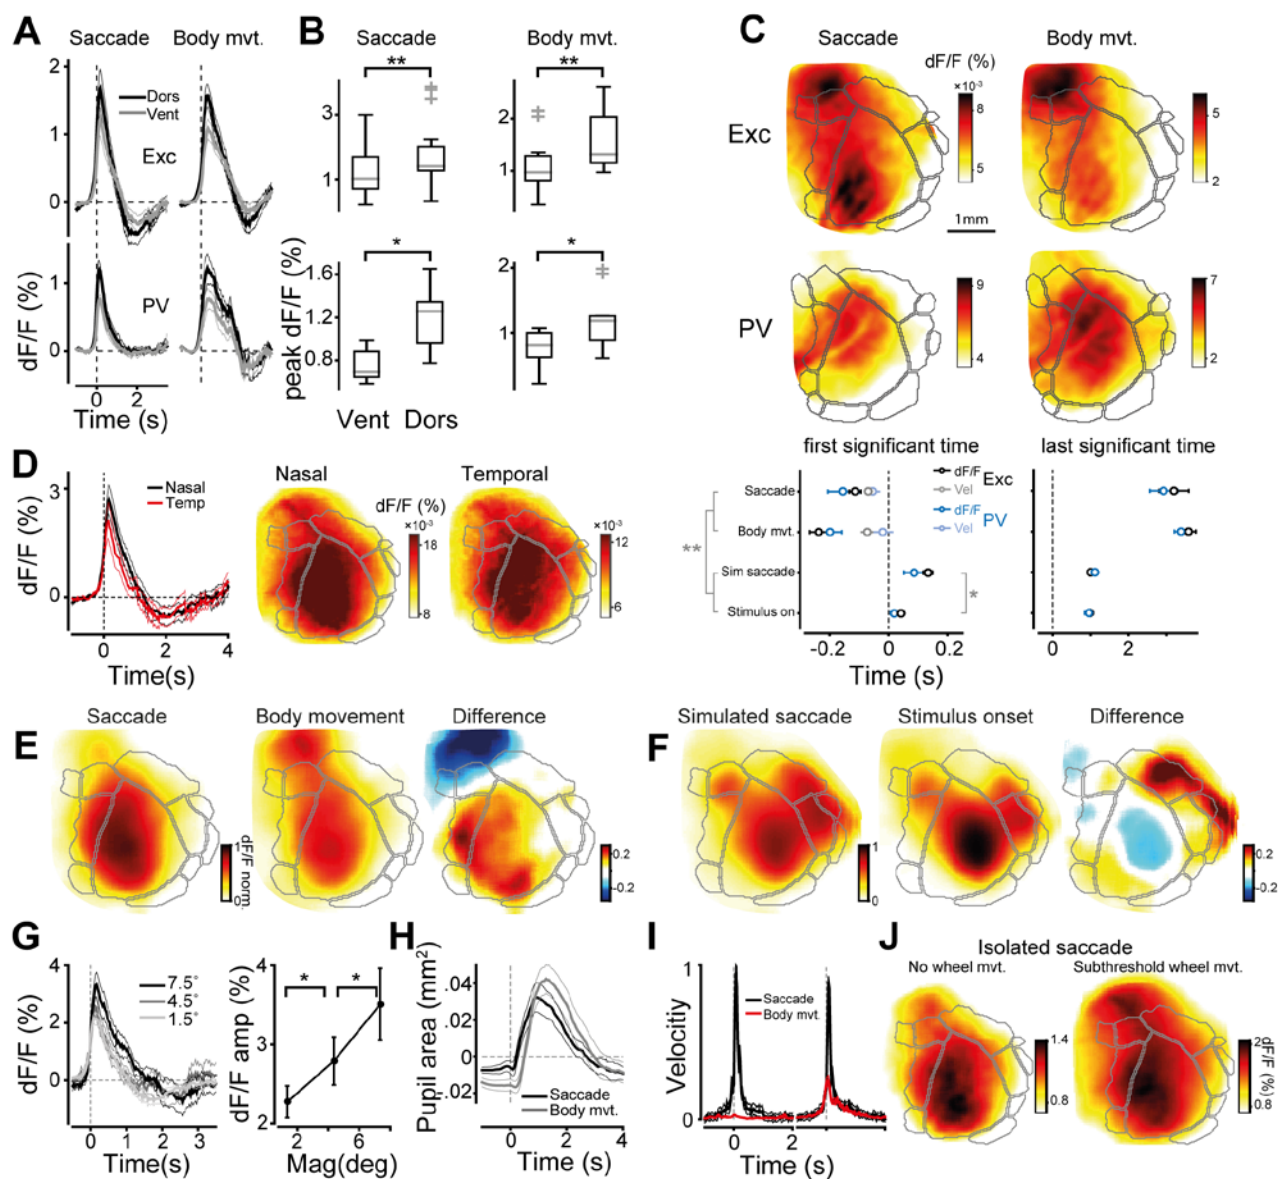

10 Extended Data Fig. 2. **a**) Isolated saccadic (left) and body movement responses averaged across dorsal (M, PM, AM, RL) and ventral (LM, P, POR) stream areas for excitatory (top) and PV (bottom) mice. **b**) Amplitude difference between ventral and dorsal stream areas at the time of peak response for saccades (left) and body movements (right):  $p=0.002$ ,  $p=0.004$  (saccades and body movement, for excitatory mice t-test,  $n=10$ );  $p=0.03$ ,  $p=0.02$  (PV,  $n=5$ ). Box and whisker plots, central line for the median, top-bottom for 25-75 percentiles, error bars extend to the most extreme data points, excluding outliers (gray crosses). **c**) Top: pre-event activity pattern for saccades (left,  $t = [-100, 0]$ ms) and body movements (right,  $t = [-100, 0]$ ms) for excitatory (top) and PV (middle) mice. Bottom: first (left) and last (right) time point significantly different from the activity in the  $[-0.8, -0.3]$ s window before saccade and body movement and in the  $[-0.3, 0]$ s window for stimulus onset and simulated saccades. For Exc: saccades,  $-110 \pm 20$ ms; body movements  $-237 \pm 31$ ms;  $n=10$ . For PV: saccades,  $-153 \pm 52$ ms; body movements  $-200 \pm 40$ ms;  $n=5$ . Delay of simulated saccade response relative to its onset:  $133 \pm 14$ ms. Gray dots, detection time of saccades and body movements from movement velocities (Methods). **d**) Left: activation maps for nasal and temporal

23 saccades in the saccade ROI (Extended Data Fig. 10j-n); t-test for difference in the peak response  
24 amplitude:  $p=0.22$  ( $n=10$ ). Right: response maps for nasal and temporal saccades at the time of peak  
25 response. **e)** Average response patterns ( $n=15$  mice) at the time of peak amplitude for saccades and body  
26 movements and their difference normalized to  $[0, 1]$ , and derived as in Extended Data Fig. 10j-n  
27 (Methods). **f)** Same as (e) for simulated saccades and for stimulus onset. **g)** Left: Saccadic responses to  
28 three different saccade amplitudes ( $1.5^\circ$ ,  $4.5^\circ$ , and  $7.5^\circ$ ; shades of gray) in saccade ROI. Right: amplitude  
29 of saccadic responses at the time of peak response for different saccade magnitudes (t-test  $p=0.01$ ,  $n=10$ );  
30 error bands, s.e. **h)** Changes of pupil area for saccades and body movements. Amplitudes are normalized  
31 (subtracted) relative to the session average (Methods). **i)** Velocities below the detection threshold can  
32 modulate the amplitude of the isolated saccadic response, as shown for trials with small (left) or large  
33 (right) subthreshold wheel velocity (Methods); error bands, s.e. **j)** Saccadic response maps for  
34 corresponding panels in (i).

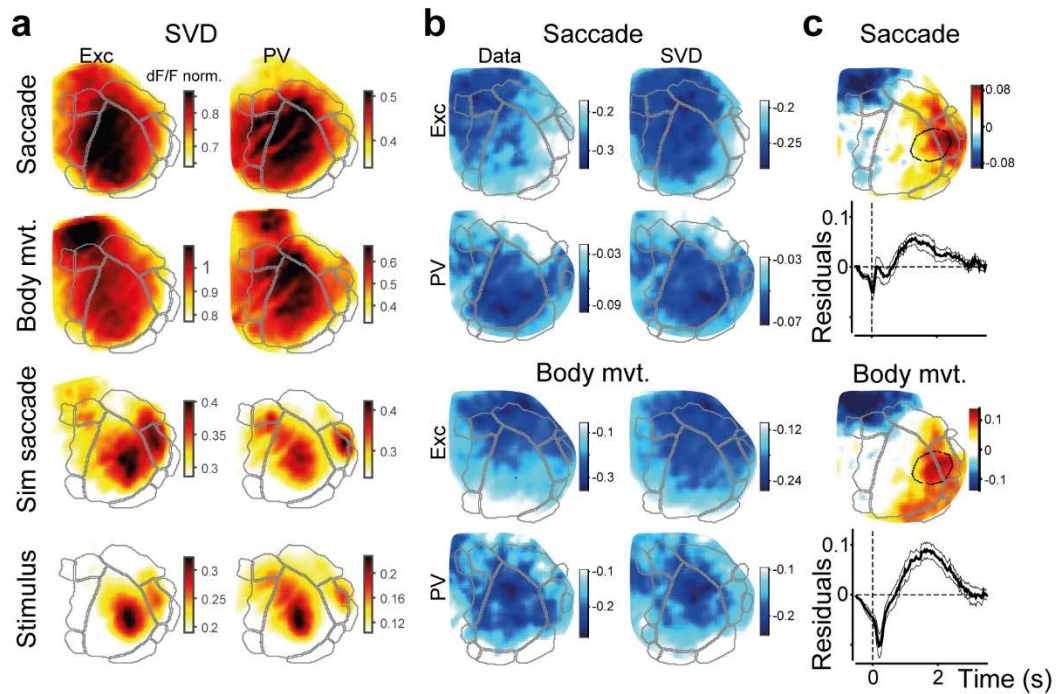

35 Extended Data Fig. 3. Singular Value Decomposition (SVD). **a** SVD model (Methods) for different events  
 36 (rows) for excitatory (left,  $n=10$ ) and PV (right,  $n=5$ ) mice. Explained variance (EV, Methods) of SVD for  
 37 saccades:  $87.8 \pm 1.3\%$  (Exc, s.e.),  $76 \pm 2\%$  (PV); for body movements:  $88.5 \pm 3.9\%$ ,  $78 \pm 3\%$ . **b** Response maps  
 38 for saccades (top) and body movement (bottom) isolated from other events (Methods), at the time of  
 39 max delayed suppression. Left, data; right, SVD. **c** Map of SVD residuals estimated using the time point  
 40 of peak residual amplitude in the stimulus motion ROI (dotted contours) ( $t=1.4$ s and  $t=1.7$ s for saccade  
 41 and body movement). Time-series of the residuals in the stimulus motion ROI are shown below the maps.  
 42 Maximum normalized residual amplitude for saccades:  $0.05 \pm 0.01$  (s.e., t-test  $p < 0.01$ ;  $n=10$ ) and for body  
 43 movements:  $0.09 \pm 0.01$  (s.e., t-test  $p < 0.001$ ). All dF/F values reported here are normalized (Methods).

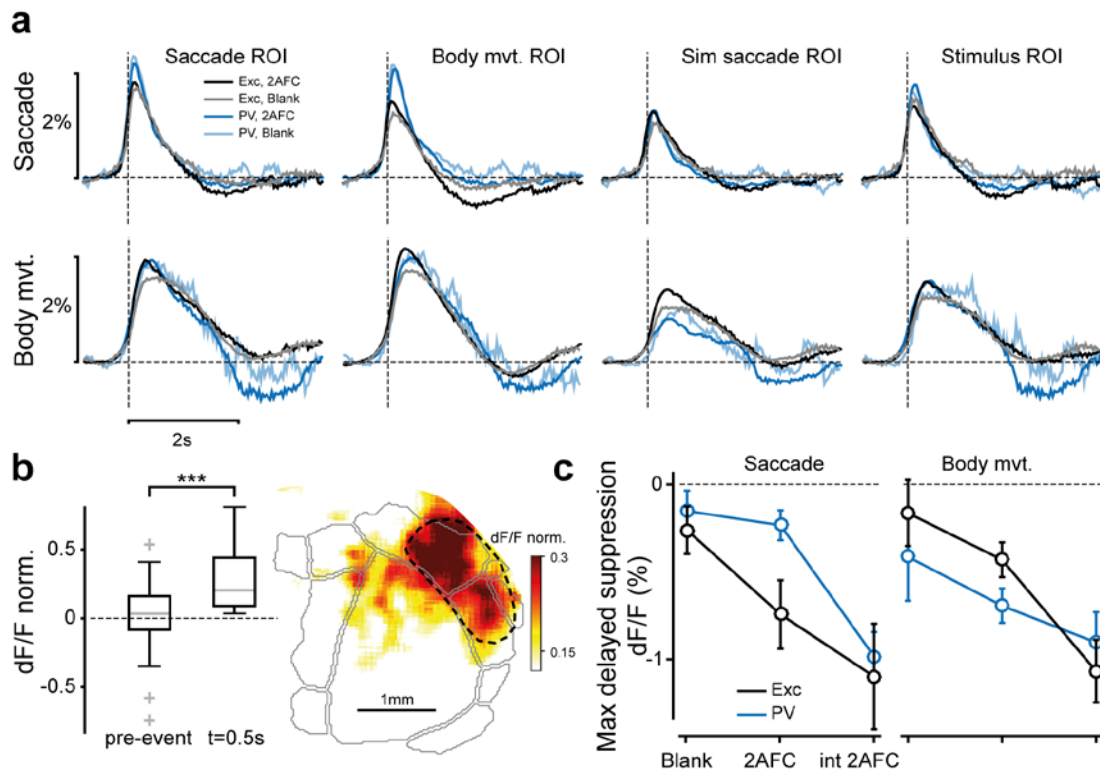

44 Extended Data Fig. 4. Isolated responses in 'blank trials' vs 2AFC conditions. **a**) Responses to saccades (top)  
 45 and body movements (bottom) in 4 different ROIs (columns), averaged across mice that have been tested  
 46 in both conditions (n=5, Exc; n=4, PV). Black and gray for excitatory mice, dark and light blue for PV mice,  
 47 during 2AFC and blank experiments, respectively (peak response in blank versus 2AFC, t-test,  $p > 0.5$ ).  
 48 FWHM was also unchanged in 2AFC vs blank conditions (t-test,  $p > 0.5$ ). **b**) Left: difference of 2AFC-blank  
 49 saccadic response amplitudes, before the saccade ([-270:-130]ms) and after, at t=0.5 (n=6,  $p < 10^{-3}$ ) with a  
 50 spatial localization in motion sensitive areas<sup>27</sup> (right panel, dashed contour line). **c**) Comparing the mean  
 51 amplitude of max delayed suppression in isolated events during blank trials, in isolated events during 2AFC  
 52 trials, and in interacting saccade-body movement events in 2AFC trials, in saccade and body movement  
 53 ROIs, for excitatory (black) and PV (blue) mice. Error bars, s.e. Delayed suppression was significantly  
 54 reduced in blank condition,  $-0.34 \pm 0.11\%$ , not different from the pre-event baseline activity (t-test,  $p = 0.1$ ,  
 55 n=5). The max amplitude of the delayed suppression was lower than baseline for saccades ( $-0.7 \pm 0.2\%$ ,  
 56 Exc, t-test  $p = 0.004$ ;  $-0.23 \pm 0.08\%$ , PV, t-test  $p = 0.051$ ) and for body movement ( $-0.4 \pm 0.1\%$ , Exc, t-test  
 57  $p = 0.001$ ;  $-0.7 \pm 0.01\%$ , PV, n=4, t-test  $p = 0.005$ ). Time of maximum delayed suppression for saccade  
 58 ( $1.9 \pm 0.13$ s, Exc;  $2.4 \pm 0.22$ s, PV), and for body movement ( $2.2 \pm 0.08$ s, Exc;  $2.6 \pm 0.09$ s, PV, n=4).

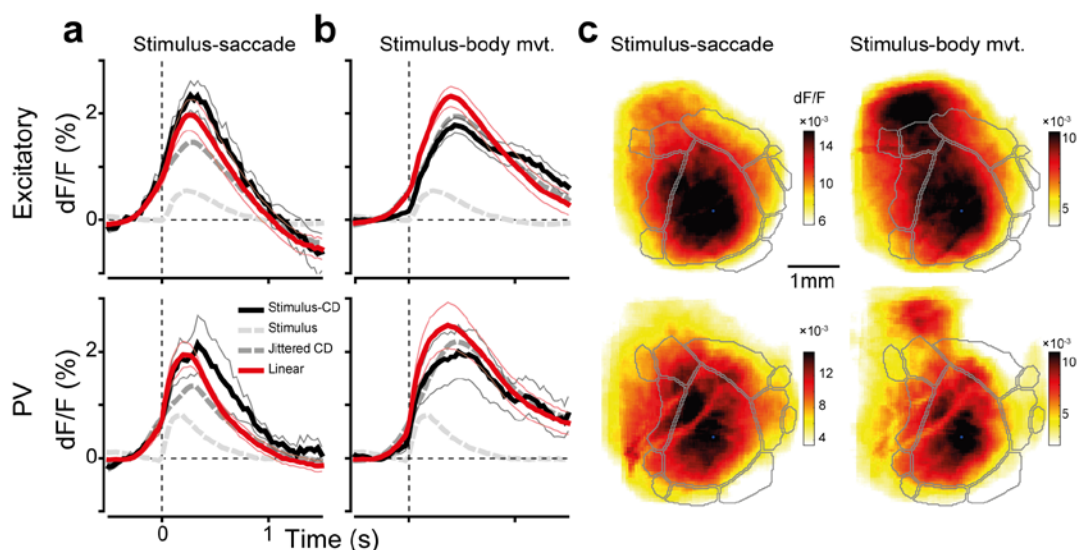

59 Extended Data Fig. 5. Linear prediction of stimulus-CD interactions: **a)** Stimulus-saccade interaction in  
 60 stimulus ROI, linear model (red, Methods) and data (black) for excitatory (top) and PV (bottom) mice. Peak  
 61 response amplitude, average across mice:  $2.1 \pm 0.22$  (dF/F (%)  $\pm$ s.e., Exc);  $1.9 \pm 0.5$ , PV. Comparable  
 62 response activations were observed for PV interneurons: peak response amplitudes were 2.4 and 2.4  
 63 times larger than the contrast response; t-test,  $p=0.06$  and  $0.05$  respectively for saccade and body  
 64 movement;  $n=5$ ; FWHM:  $0.53 \pm 0.03$  and  $0.71 \pm 0.03$ s; t-test w/w contrast response:  $p=0.3$  and  $p=0.2$ . **b)**  
 65 Same as (a) for stimulus-body movement interactions in stimulus ROI. Peak response amplitude, average  
 66 across mice:  $1.7 \pm 0.14$  for excitatory;  $1.9 \pm 0.46$  for PV. **c)** Activation maps for corresponding panels in (a)  
 67 and (b) at the time of peak response.

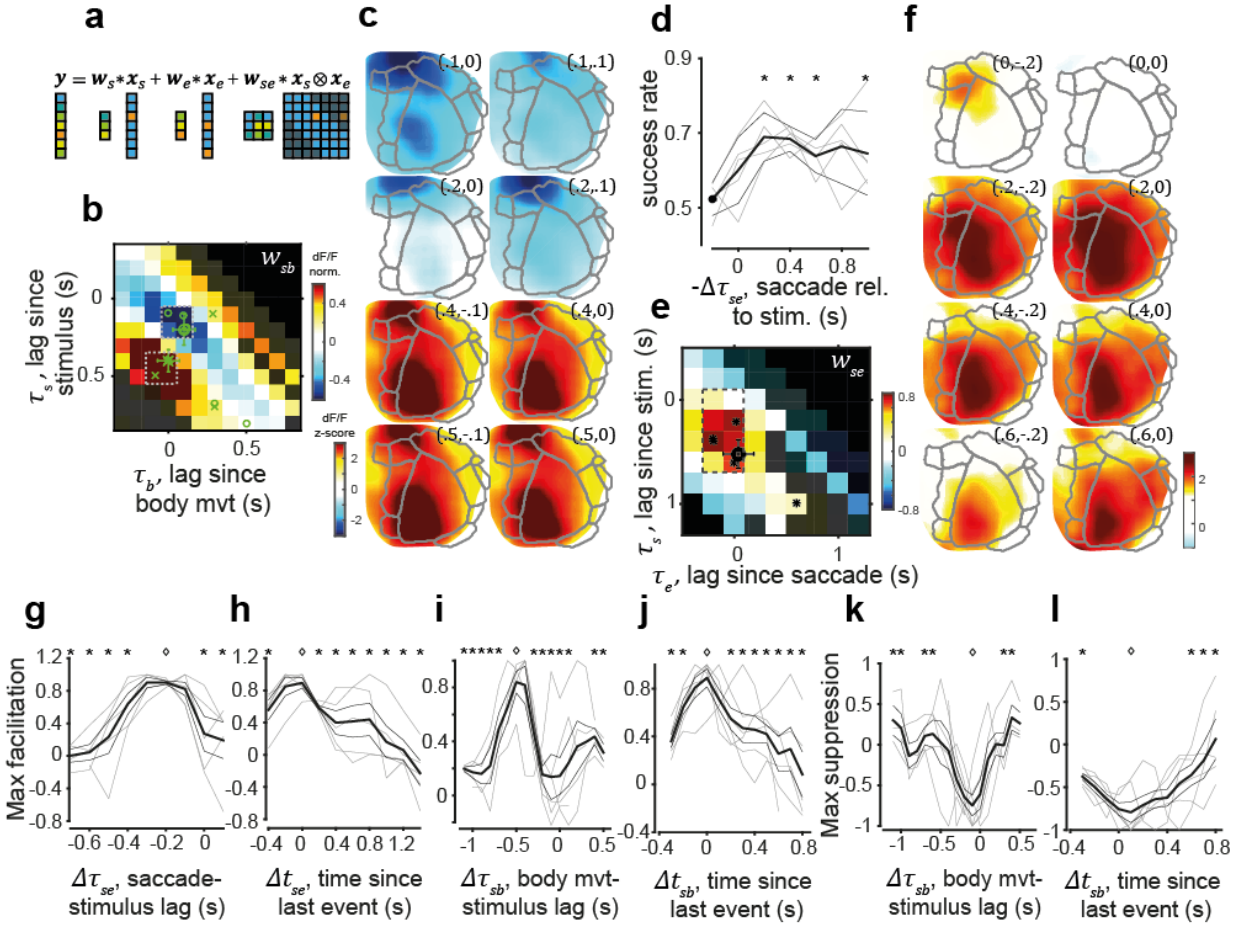

68 Extended Data Fig. 6. GLM predictions for stimulus-CD interactions. **a)** GLM with example stimulus-CD  
69 (eye movement) nonlinear interaction term (Methods). Inputs  $x_s, x_e$  are convolved (\*) with respective  
70 kernels  $w_s, w_e$ , and outer product  $x_s \otimes x_e$  is convolved with  $w_{se}$  along the diagonal. **b)** Normalized  
71 stimulus-body movement interaction kernel  $w_{sb}$  estimated from isolated stimulus-body movement pairs,  
72 average of excitatory mice ( $n=6$ ). Nonlinear interaction of stimulus and body movement occurring with a  
73 fixed relative lag,  $\Delta\tau_{sb} = \tau_b - \tau_s$ , corresponds to values along a diagonal parallel to main, with  $\Delta\tau > 0$   
74 (elements above diagonal) when body movement happens first. Elements in black are unattainable since  
75 the earliest body movement could happen 0.5s before the stimulus, dim-color elements are estimated  
76 from  $n < 5$  animals. Green circles, maximum suppression lags of individual animals; large circle, their  
77 median ( $\tau_b = 0.1 \pm 0.07s$ ,  $\tau_s = 0.2 \pm 0.1s$ , median-based s.e.). Green crosses, maximum facilitation lags of  
78 individual animals; large cross, their median ( $\tau_b = 0 \pm 0.07s$ ,  $\tau_s = 0.4 \pm 0.07s$ ). Elements within two dashed  
79 white squares are used for predictions in (c) **c)** Amplitude of the nonlinear component during body  
80 movement-stimulus interaction predicted by the GLM, each frame of a given animal is normalized by  
81 standard deviation of its dF/F pixel values and averaged across animals; frames correspond to kernel  
82 elements marked with a dashed line in (b), lags ( $\tau_s, \tau_b$ ) (s) are shown in the upper-right corner. **d)** Success  
83 rate on trials with an isolated stimulus-saccade interaction as a function of saccade time-time relative to  
84 stimulus onset. Black lines - population average and confidence intervals, faint lines - individual animals.  
85 Success rates significantly better than that at  $\Delta\tau_{se} = -0.2s$  are marked with asterisks (U-test,  $\alpha = 0.05$ ). **e)**  
86 Normalized stimulus-eye movement interaction kernel  $w_{se}$  estimated from isolated pairs, average of  
87 excitatory mice ( $n=5$ ). Maximally facilitating elements of individual animals are shown with black asterisks:

88 population mean, black circle ( $\tau_e=0.04\pm0.15s$ ;  $\tau_s=0.52\pm0.14s$ ; s.e.). Elements within dashed black  
89 rectangle are used for prediction in (f). **f**) Amplitude of the nonlinear component during saccade-stimulus  
90 interaction predicted by the GLM, normalization as in (c), frames correspond to the highlighted kernel  
91 elements in (e), lags ( $\tau_s, \tau_e$ ) (s) are shown in the upper-right corner. **g**) Maximum facilitation as function  
92 of relative lag between saccade and stimulus  $\Delta\tau_{se} = \tau_e - \tau_s$ . Black lines - population average with  
93 confidence intervals, faint lines - individual animals, asterisks show values significantly different from  
94 population maximum (diamond) (U-test,  $\alpha=0.05$ ). **h**) Maximum facilitation as function of time since the  
95 saccade or stimulus onset, whichever happened last,  $\Delta t_{se} = \min(\tau_e, \tau_b)$ , same colors and statistical tests  
96 as in (g). **i,j**) Analogous to (g,h) but for maximum facilitation in the body movement-stimulus interaction.  
97 **k,l**) Analogous to (g,h) but for maximum suppression in the body movement-stimulus interaction.



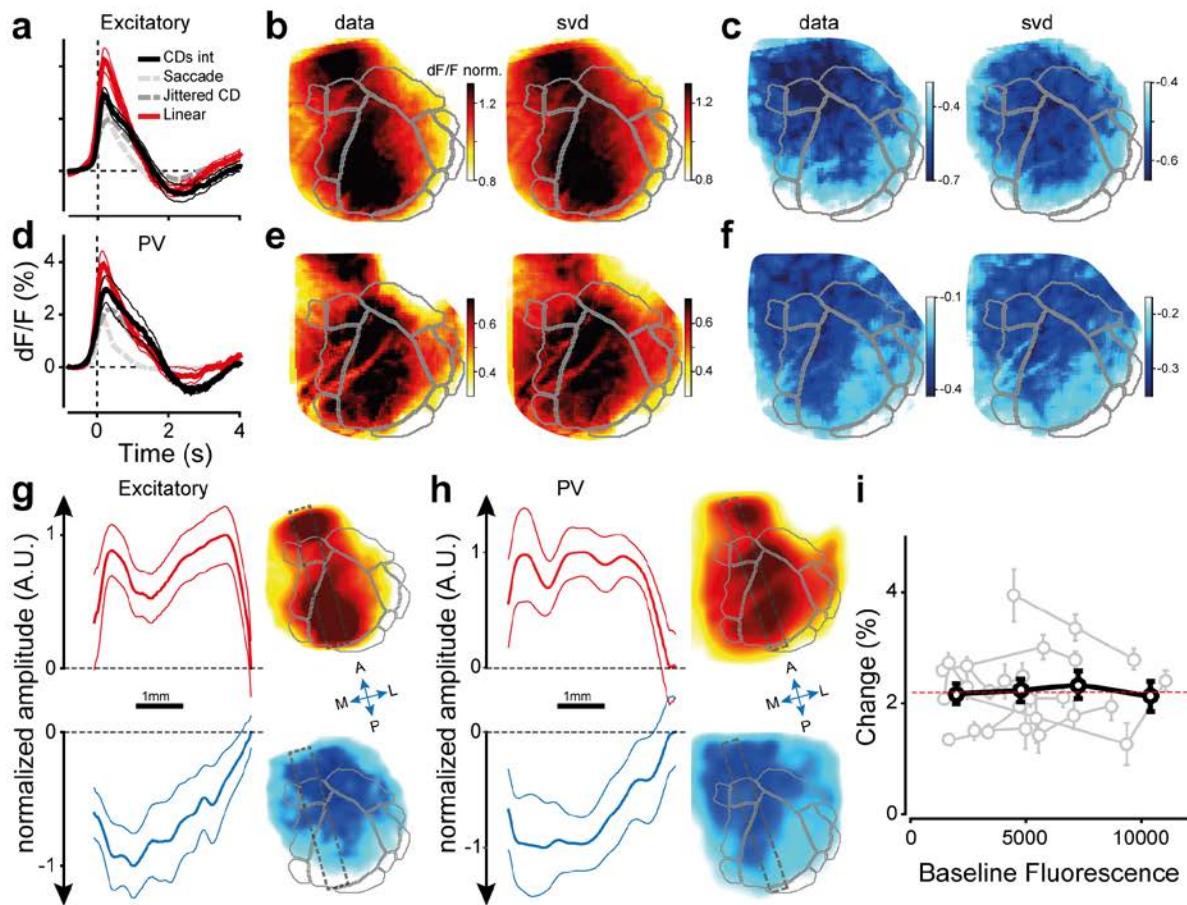

98 Extended Data Fig. 7. Linear prediction of CDs interactions. **a**) Linear model (red, Methods) and data  
 99 (black) for excitatory mice. **b**) Activity maps at the time of peak response for interacting CDs in excitatory  
 100 mice. Left panel, data; right panel, SVD (Methods). **c**) Activity maps at the time of max delayed  
 101 suppression. **d-f**) Same as a-c for PV mice. **g-h**) Left panels: comparison of spatial activations at times of  
 102 peak response (top-left) and max suppression (bottom-left) in excitatory (g) and PV (h) mice. Maps in the  
 103 right panels have been smoothed relative to (b,c,e,f) to reduce pixel noise. Left-panels, responses are pixel  
 104 averages within the dashed black rectangles shown in right-panel maps. Error bands are s.e. Values are  
 105 normalized between zero and  $\pm 1$ . **i**) GCaMP responses do not saturate during CD interactions (Methods).  
 106 Peak fluorescence change (%) during interacting CDs as a function of the associated baseline fluorescence  
 107 (averaged across trials) for individual mice (gray lines and symbols; error bars, 95% CI) and for the average  
 108 across animals (black line and symbols; error bars, s.e.; n=9). Red dashed line, linear fit to data from all  
 109 mice.

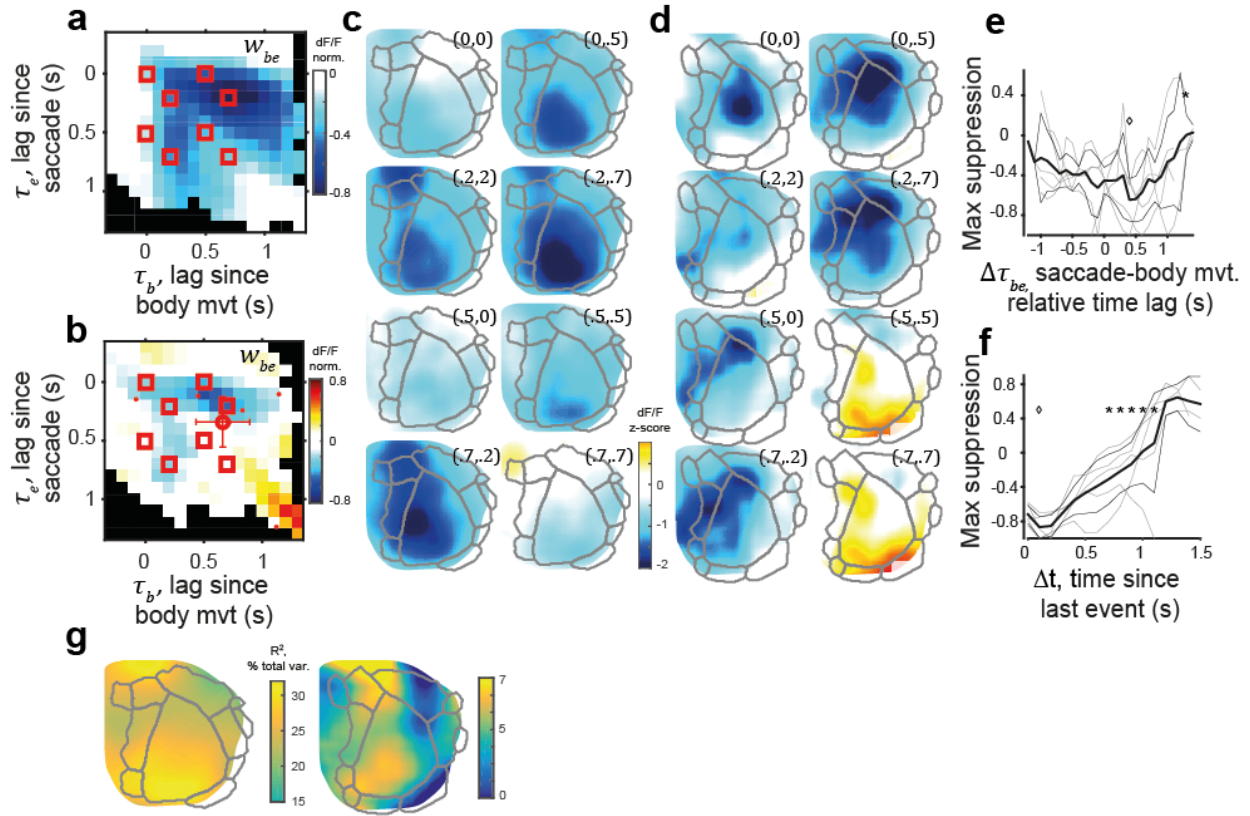

110 Extended Data Fig. 8. GLM predictions for CD-CD interactions. **a**) Normalized saccade-body movement  
 111 interaction kernel averaged across excitatory mice ( $n=8$ ) (Fig. 2e) with elements corresponding to (c) in  
 112 red boxes. **b**) Population average of normalized saccade-body movement interaction kernel, PV mice ( $n=5$ )  
 113 with elements corresponding to (d) in red boxes. Red dots, maximum suppression lags of individual  
 114 animals; circle with error bars, average lags across animals ( $\tau_b=0.66\pm0.23s$ ,  $\tau_e=0.34\pm0.22s$ , s.e.). Masked  
 115 values (black) for  $n<5$  animals. **c**) Amplitude of nonlinear saccade-body movement component, eight  
 116 example frames, red square in (a); insets for lags ( $\tau_s, \tau_b$ ); average across excitatory mice. Frames of  
 117 individual mice are normalized to the standard deviation of  $dF/F$  in that frame. **d**) Same as (c), but for PV  
 118 mice; same color bar. **e**) Maximum suppression as a function of  $\Delta\tau_{be} = \tau_b - \tau_e$ , for PV mice, similar to  
 119 Fig. 2f. Black lines, population average with confidence intervals. Faint lines, individual animals. Asterisks,  
 120 lags with suppression significantly different from curve minimum (diamond), (U-test,  $\alpha=0.05$ ). Average  
 121  $\Delta\tau_{be}$  of minimum:  $0.34 \pm 0.22$  s.e. **f**) Maximum suppression as function of time since the last event,  $\Delta t =$   
 122  $\min(\tau_b, \tau_e)$ . Colors as in (e); asterisks,  $\Delta t$  with data for  $n=5$  animals significantly different from average  
 123 curve minimum (U-test,  $\alpha=0.05$ ). Average time:  $\Delta t=0.28\pm0.21$ , s.e. **g**) Left. Average variance explained ( $R^2$ )  
 124 by the full model with interactions, excitatory mice ( $n=8$ ). Right. Same for PV mice ( $n=5$ ), where kernels  
 125 are more strongly penalized by regularization (Methods).

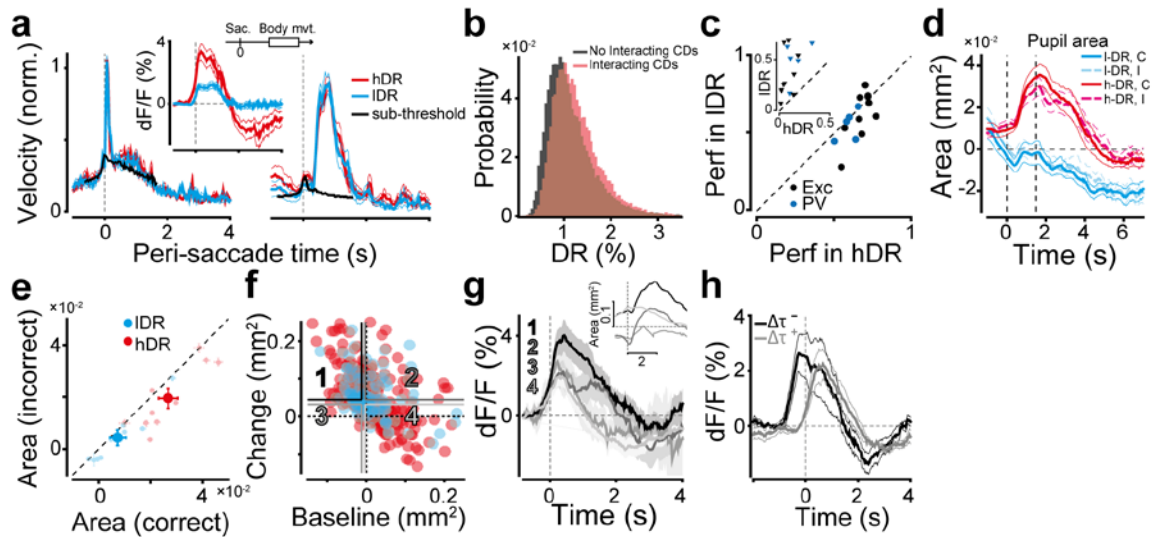

126 Extended Data Fig. 9. **a**) The occurrence of CDs was neither sufficient nor necessary for high DR values.  
 127 Velocity of interacting saccade (left) and body movements (right) aligned to the time of saccade, for  $\Delta\tau^+$   
 128 lag, separated for high and low DR. Middle-top inset, schematic of the temporal window for body  
 129 movements relative to zero-time saccades. Equal saccadic and body movement velocities dF/F are  
 130 associated to different responses in high and low DR states (middle inset, red-blue for high-low DR). Black  
 131 curve: subthreshold velocity of saccades around isolated body movements (left), and subthreshold  
 132 velocity of wheel movements around isolated saccades (right), replotted from insets in Fig. 1f. The  
 133 subthreshold movement components are not a unique feature of isolated events (Fig. 1f, Extended Data  
 134 Fig. 2i) and are similarly present during interactions. **b**) Probability distribution of DR in trials with or  
 135 without interacting CDs (t-test  $p < 10^{-4}$ ). **c**) Performance in high versus low DR across all trials, excluding  
 136 timeouts. Inset: proportion of timeout trials in high versus low DR. **d**) Pupil area for high and low DR,  
 137 with trials separated by choices: correct, solid line; incorrect, dashed line **e**) Maximum amplitude of pupil area  
 138 in correct versus incorrect trials separated to high and low DR (pale symbols: individual mice; solid  
 139 symbols: average across mice; error: s.e.,  $n=10$ ). **f-g**) Same as Fig. 3f,g, for PV mice. **h**) Same as Fig. 4h, for  
 140 PV mice.

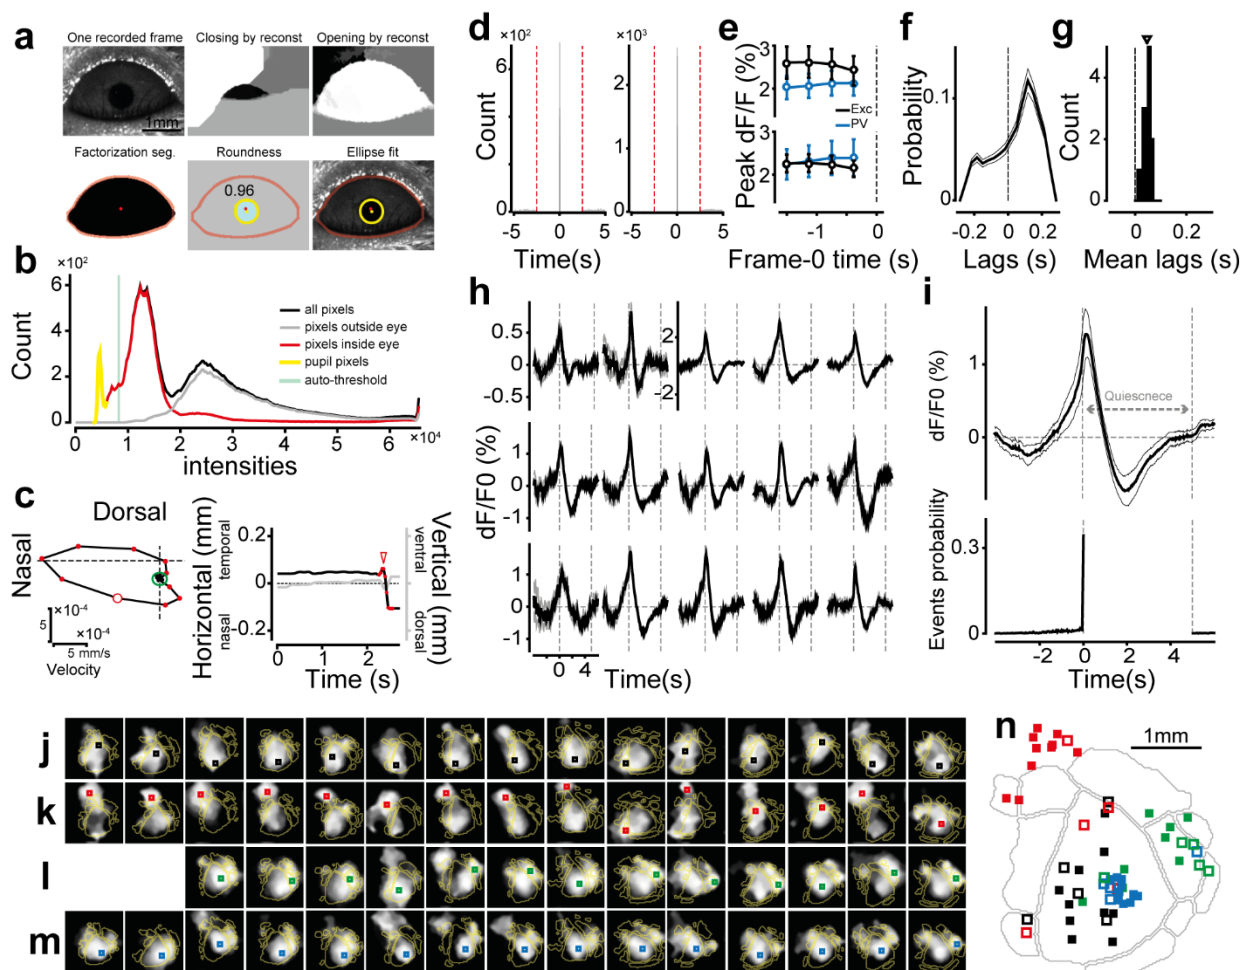

141 Extended Data Fig. 10. **a)** Frame-by-frame processing steps to estimate the area and center position of  
 142 the pupil. **b)** Threshold estimation based on intensity distributions within and outside the eye segment  
 143 (Otsu 1979). **c)** Saccade detection by adaptive elliptic thresholding (left, Methods): black line, velocity  
 144 trace during a trial; large red dot, time of saccade detected outside the elliptic threshold (green circle).  
 145 Small red dots, potential saccades also outside the elliptic threshold, but excluded based on a minimum-  
 146 amplitude threshold (Methods). Right: Pupil position over time (black and gray for azimuth and elevation,  
 147 respectively). Arrowhead indicates the time of the detected saccade (the large red dot on the left panel);  
 148 small red dots, time-points as in left panel. Horizontal dotted line, average pupil position across trials. **d)**  
 149 Histogram count of time-aligned isolated saccades (left) and body movements (right) and of events  
 150 outside the isolation window (red dashed lines), not visible in this y-scale. **e)** Peak responses of isolated  
 151 saccades (top) and body movements (bottom) do not depend on the temporal distance from the detected  
 152 event of the temporal window used for frame-0 correction (Methods). Error bars, s.e. **f)** Probability of  
 153 saccade-body movement lags to be within a  $[-0.25, 0.25]$ s window from each other; average across  
 154 animals ( $n=15$ ). Negative times: saccades before body movements. **g)** Distribution of the mean lag across  
 155 animals; triangle, grand mean, 45ms, t-test,  $p < 10^{-4}$ . **h)** Estimating an appropriate duration for the isolation  
 156 window (ERA analysis) using a “quiescence period”: trial averaged responses for individual mice aligned  
 157 to the beginning of a 5s period ( $t=0$ , and vertical dashed lines) with no detected saccade or body  
 158 movement (quiescent period). Error bars, 95% CI. **i)** Top: average of responses shown in (h), the response

159 goes back to baseline at the end of the quiescent period. Bottom: probability of events happening outside  
160 the quiescence period, average across animals. The spike at zero is expected given how the quiescent  
161 period has been defined. **j-m**) Average of thresholded amplitude maps (Methods) used to define ROIs for  
162 ERAs shown in Fig. 1f. **j**) Saccade, **k**) body movement, **l**) simulated saccade, **m**) stimulus onset. Colored  
163 square, location of the peak responses. **n**) All ROIs for all mice after retinotopically aligning the maps.  
164 Filled symbols, excitatory mice; empty symbols, PV. Black, red, green and blue, same as (j-m).
